# Supplementary material
Source: PubMed Central journal article supplement (PMC3690469)
Supplement: NIHMS310192-supplement-Supplementary_Table_Legends.pdf [file NIHMS310192-supplement-Supplementary_Table_Legends.pdf]

## **Supplemental Table Legend**

**Supplemental Table 1.** Description and features of the four major human cancer sample types.

**Supplemental Table 2.** Copy number alterations present in a panel of 50 malignant glioma cell lines. These copy number data were generated on Affymetrix 6.0 SNP arrays by the Cancer Genome Project of the Wellcome Trust Sanger Institute.

**Supplemental Table 3.** Mean copy number values reported by the TCGA of the genomic deletions in primary tumor samples containing homozygous deletions of CDKN2A (a), PTEN (b), CDKN2C (c), and NF1 (d).
